# Supplementary material for: An investigation into transition states of cyclic tetra-atomic silicon and germanium interstellar dust compounds: SixC4−x, GexC4−x, and GexSi4−x (x ∈ {1,2,3})
Source: Royal Society of Chemistry journal article supplement (doi:10.1039/d4cp02150a), 2024-01-01
Supplement: d4cp02150a1.pdf [file d4cp02150a1.pdf]

**Supplementary Information: An Investigation  
into Transition States of Cyclic Tetra-Atomic  
Silicon and Germanium Interstellar Dust  
Compounds:  $\text{Si}_x\text{C}_{4-x}$ ,  $\text{Ge}_x\text{C}_{4-x}$ , and  $\text{Ge}_x\text{Si}_{4-x}$   
( $x \in \{1, 2, 3\}$ )**

A. Mackenzie Flowers, Alex Brown,\* and Mariusz Klobukowski\*

*Department of Chemistry, University of Alberta, Edmonton, AB T6G 2G2, Canada*

E-mail: alex.brown@ualberta.ca; mariusz@ualberta.ca

## Supporting Data

Table S1:  $X_xY_{4-x}$  ( $x \in \{1, 2, 3\}$ ) family relative energies (in  $\text{kJ mol}^{-1}$ ) of optimized geometries with inclusion of harmonic zero-point vibrational energy (ZPVE). Relative energies are taken with respect to the lowest energy isomer in each group. Results calculated using the B3LYP-D3BJ, M06-2X, and  $\omega$ B97X-D4 functionals, all using the aug-cc-pVTZ basis set.

| Structure | SiC        | GeC   | GeSi  | SiC    | GeC   | GeSi  | SiC              | GeC   | GeSi  |
|-----------|------------|-------|-------|--------|-------|-------|------------------|-------|-------|
|           | B3LYP-D3BJ |       |       | M06-2X |       |       | $\omega$ B97X-D4 |       |       |
| $XY_3$    |            |       |       |        |       |       |                  |       |       |
| d         | 0.0        | 0.0   | 0.0   | 0.0    | 0.0   | 0.0   | 0.0              | 0.0   | 0.0   |
| r         | 14.9       | -0.5  | 13.9  | 31.7   | 22.1  | 15.8  | 31.7             | 20.8  | 21.5  |
| TS        | 152.9      | 148.0 | 83.7  | 196.3  | 179.1 | 139.4 | 206.6            | 186.5 | 151.5 |
| $X_2Y_2$  |            |       |       |        |       |       |                  |       |       |
| r         | 0.0        | 25.8  | 0.0   | 0.0    | 15.9  | 0.0   | 0.0              | 17.6  | 0.0   |
| t         | 19.4       | 0.0   | 10.5  | 32.4   | 0.0   | 11.3  | 30.0             | 0.0   | 18.4  |
| d         | 345.6      | 395.6 | 26.9  | 376.9  | 435.5 | 30.1  | 384.1            | 425.9 | 41.7  |
| TS r-t    | 136.8      | 176.1 | 81.5  | 188.8  | 163.6 | 141.9 | 196.4            | 170.7 | 143.9 |
| TS d-r    | 336.2      | 420.3 | 88.1  | 405.4  | 460.7 | 146.7 | 424.9            | 468.4 | 158.1 |
| $X_3Y$    |            |       |       |        |       |       |                  |       |       |
| r         | 0.0        | 0.0   | 0.0   | 0.0    | 0.0   | 0.0   | 0.0              | 0.0   | 0.0   |
| d         | 216.1      | 199.2 | 13.2  | 232.0  | 225.0 | 13.5  | 232.2            | 217.6 | 20.3  |
| TS        | 219.2      | 238.1 | 106.3 | 272.2  | 265.8 | 135.5 | 283.1            | 266.6 | 138.3 |

Table S2:  $X_xY_{4-x}$  ( $x \in \{1, 2, 3\}$ ) family barrier heights (in  $\text{kJ mol}^{-1}$ ) of optimized geometries with inclusion of harmonic zero-point vibrational energy (ZPVE). Each barrier height is shown as going from either structure to its respective transition state. All results at the B2GP-PLYP/AVTZ level of theory.

| Structure                     | SiC   | GeC   | GeSi  |
|-------------------------------|-------|-------|-------|
| XY <sub>3</sub>               |       |       |       |
| r-d                           | 164.1 | 155.2 | 127.6 |
| d-r                           | 187.9 | 166.2 | 138.8 |
| X <sub>2</sub> Y <sub>2</sub> |       |       |       |
| t-r                           | 155.4 | 158.3 | 138.7 |
| r-t                           | 181.3 | 142.4 | 147.5 |
| d-r                           | 15.2  | 21.4  | 118.3 |
| r-d                           | 351.9 | 371.4 | 139.5 |
| X <sub>3</sub> Y              |       |       |       |
| d-r                           | 48.6  | 47.9  | 120.3 |
| r-d                           | 258.7 | 241.2 | 130.5 |

Table S3:  $X_xY_{4-x}$  ( $x \in \{1, 2, 3\}$ ) family zero-point energy contributions in  $\text{kJ mol}^{-1}$ . Results calculated using the B3LYP-D3BJ and M06-2X functionals, all using the aug-cc-pVTZ basis set.

| Structure                     | SiC        | GeC  | GeSi | SiC    | GeC  | GeSi |
|-------------------------------|------------|------|------|--------|------|------|
|                               | B3LYP-D3BJ |      |      | M06-2X |      |      |
| XY <sub>3</sub>               |            |      |      |        |      |      |
| d                             | 28.5       | 26.2 | 11.0 | 30.3   | 28.2 | 11.8 |
| r                             | 27.6       | 26.3 | 10.7 | 28.5   | 27.1 | 11.4 |
| TS                            | 23.5       | 22.6 | 9.5  | 24.8   | 23.4 | 9.7  |
| X <sub>2</sub> Y <sub>2</sub> |            |      |      |        |      |      |
| r                             | 24.6       | 20.9 | 9.7  | 25.8   | 22.1 | 10.5 |
| t                             | 23.4       | 20.5 | 9.5  | 24.2   | 21.5 | 10.2 |
| d                             | 18.4       | 14.9 | 9.2  | 19.0   | 15.5 | 9.8  |
| TS r-t                        | 19.9       | 17.4 | 9.1  | 21.0   | 17.8 | 9.4  |
| TS d-r                        | 18.1       | 14.0 | 8.1  | 18.4   | 14.6 | 8.5  |
| X <sub>3</sub> Y              |            |      |      |        |      |      |
| r                             | 18.4       | 13.5 | 8.3  | 19.1   | 14.3 | 9.7  |
| d                             | 15.6       | 11.0 | 8.0  | 16.2   | 11.7 | 8.6  |
| TS                            | 15.1       | 10.4 | 7.0  | 15.3   | 11.0 | 7.3  |

Table S4:  $X_xY_{4-x}$  ( $x \in \{1, 2, 3\}$ ) family zero-point energy contributions in  $\text{kJ mol}^{-1}$ . Results calculated using the  $\omega\text{B97X-D4}$  and  $\text{B2GP-PLYP}$  functionals, all using the aug-cc-pVTZ basis set.

| Structure              | SiC                    | GeC  | GeSi | SiC                | GeC  | GeSi |
|------------------------|------------------------|------|------|--------------------|------|------|
|                        | $\omega\text{B97X-D4}$ |      |      | $\text{B2GP-PLYP}$ |      |      |
| $\text{XY}_3$          |                        |      |      |                    |      |      |
| d                      | 30.3                   | 28.3 | 12.3 | 28.9               | 26.8 | 11.4 |
| r                      | 29.0                   | 27.5 | 12.0 | 28.3               | 26.9 | 11.1 |
| TS                     | 24.9                   | 23.4 | 9.7  | 24.0               | 22.5 | 9.9  |
| $\text{X}_2\text{Y}_2$ |                        |      |      |                    |      |      |
| r                      | 26.2                   | 22.4 | 11.0 | 24.8               | 21.3 | 10.2 |
| t                      | 24.7                   | 21.6 | 10.7 | 23.7               | 20.9 | 9.8  |
| d                      | 19.3                   | 16.0 | 10.4 | 18.8               | 15.5 | 9.6  |
| TS r-t                 | 21.7                   | 18.9 | 10.2 | 20.1               | 17.7 | 9.0  |
| TS d-r                 | 18.5                   | 14.7 | 8.9  | 23.9               | 18.4 | 8.6  |
| $\text{X}_3\text{Y}$   |                        |      |      |                    |      |      |
| r                      | 19.7                   | 14.7 | 9.4  | 18.7               | 14.0 | 8.7  |
| d                      | 16.7                   | 12.3 | 9.1  | 15.8               | 11.4 | 8.5  |
| TS                     | 15.6                   | 11.0 | 7.8  | 15.2               | 10.5 | 7.5  |

Table S5:  $X_x Y_{4-x}$  ( $x \in \{1, 2, 3\}$ ) family Gibbs energy contributions (at  $T = 298.15\text{K}$ ) in  $\text{kJ mol}^{-1}$ . Results calculated using the B3LYP-D3BJ and M06-2X functionals, all using the aug-cc-pVTZ basis set.

| Structure | SiC        | GeC   | GeSi  | SiC    | GeC   | GeSi  |
|-----------|------------|-------|-------|--------|-------|-------|
|           | B3LYP-D3BJ |       |       | M06-2X |       |       |
| $XY_3$    |            |       |       |        |       |       |
| d         | -38.0      | -43.9 | -68.6 | -36.0  | -41.5 | -69.1 |
| r         | -39.9      | -44.8 | -70.5 | -38.6  | -43.5 | -69.5 |
| TS        | -44.9      | -51.3 | -72.8 | -43.1  | -48.1 | -70.0 |
| $X_2Y_2$  |            |       |       |        |       |       |
| r         | -44.7      | -55.1 | -72.7 | -43.4  | -53.7 | -71.5 |
| t         | -48.9      | -58.6 | -74.6 | -47.8  | -57.0 | -73.5 |
| d         | -50.2      | -61.6 | -73.0 | -49.5  | -60.9 | -72.0 |
| TS r-t    | -51.9      | -60.9 | -74.6 | -50.8  | -61.1 | -73.1 |
| TS d-r    | -50.8      | -60.8 | -72.6 | -50.4  | -60.2 | -72.1 |
| $X_3Y$    |            |       |       |        |       |       |
| r         | -55.0      | -69.4 | -76.8 | -54.1  | -68.2 | -77.4 |
| d         | -60.1      | -73.7 | -78.7 | -59.4  | -72.6 | -77.6 |
| TS        | -59.7      | -73.0 | -78.3 | -58.8  | -71.1 | -77.7 |

Table S6:  $X_xY_{4-x}$  ( $x \in \{1, 2, 3\}$ ) family Gibbs energy contributions (at  $T = 298.15\text{K}$ ) in  $\text{kJ mol}^{-1}$ . Results calculated using the  $\omega\text{B97X-D4}$ , and  $\text{B2GP-PLYP}$  functionals, all using the  $\text{aug-cc-pVTZ}$  basis set.

| Structure              | SiC                    | GeC   | GeSi  | SiC                | GeC   | GeSi  |
|------------------------|------------------------|-------|-------|--------------------|-------|-------|
|                        | $\omega\text{B97X-D4}$ |       |       | $\text{B2GP-PLYP}$ |       |       |
| $\text{XY}_3$          |                        |       |       |                    |       |       |
| d                      | -35.8                  | -41.3 | -66.5 | -37.5              | -42.9 | -69.6 |
| r                      | -38.0                  | -42.9 | -66.8 | -38.9              | -43.7 | -69.7 |
| TS                     | -43.0                  | -48.0 | -71.3 | -44.3              | -49.5 | -73.0 |
| $\text{X}_2\text{Y}_2$ |                        |       |       |                    |       |       |
| r                      | -42.9                  | -53.1 | -70.6 | -44.4              | -54.5 | -71.8 |
| t                      | -47.2                  | -56.7 | -72.5 | -48.5              | -57.7 | -74.0 |
| d                      | -49.1                  | -60.2 | -71.0 | -49.7              | -60.8 | -72.2 |
| TS r-t                 | -49.8                  | -58.7 | -71.5 | -51.8              | -60.4 | -74.1 |
| TS d-r                 | -50.3                  | -60.1 | -71.3 | -44.7              | -55.9 | -72.0 |
| $\text{X}_3\text{Y}$   |                        |       |       |                    |       |       |
| r                      | -53.2                  | -67.3 | -76.5 | -54.6              | -68.5 | -77.7 |
| d                      | -58.6                  | -71.6 | -74.9 | -60.0              | -73.0 | -77.7 |
| TS                     | -58.4                  | -71.9 | -76.9 | -59.0              | -71.8 | -77.2 |

Table S7: Harmonic fundamental vibrational frequencies (in  $\text{cm}^{-1}$ ) of SiC isomers at the B3LYP-D3BJ/AVTZ level of theory. Intensities in  $\text{km mol}^{-1}$ .

| Mode | Frequency                             | Intensity | Frequency                            | Intensity | Frequency                        | Intensity |
|------|---------------------------------------|-----------|--------------------------------------|-----------|----------------------------------|-----------|
|      | d-SiC <sub>3</sub>                    |           | r-SiC <sub>3</sub>                   |           | TS-SiC <sub>3</sub>              |           |
| 6    | 1406.2                                | 203.2     | 1592.4                               | 52.6      | -813.4                           | n/a       |
| 5    | 1037.4                                | 1.6       | 1155.9                               | 3.5       | 1464.1                           | 34.2      |
| 4    | 1007.2                                | 54.7      | 784.8                                | 20.1      | 1053.6                           | 33.6      |
| 3    | 674.1                                 | 49.5      | 499.2                                | 50.6      | 726.8                            | 60.1      |
| 2    | 398.9                                 | 40.6      | 384.9                                | 3.5       | 427.5                            | 5.3       |
| 1    | 236.8                                 | 10.6      | 198.4                                | 52.6      | 263.8                            | 11.8      |
|      | r-Si <sub>2</sub> C <sub>2</sub>      |           | t-Si <sub>2</sub> C <sub>2</sub>     |           | d-Si <sub>2</sub> C <sub>2</sub> |           |
| 6    | 1126.6                                | 0.0       | 1588.8                               | 14.3      | -214.4                           | n/a       |
| 5    | 973.5                                 | 310.6     | 710.0                                | 26.4      | 757.1                            | 0.0       |
| 4    | 957.9                                 | 0.0       | 628.9                                | 70.4      | 662.3                            | 17.1      |
| 3    | 503.1                                 | 0.0       | 494.3                                | 5.2       | 600.7                            | 0.0       |
| 2    | 357.7                                 | 58.8      | 283.8                                | 1.2       | 547.0                            | 0.0       |
| 1    | 196.4                                 | 3.7       | 204.0                                | 11.4      | 506.1                            | 0.0       |
|      | TS-r-t-Si <sub>2</sub> C <sub>2</sub> |           | TS-d-rSi <sub>2</sub> C <sub>2</sub> |           | r-Si <sub>3</sub> C              |           |
| 6    | -479.7                                | n/a       | -607.9                               | n/a       | 1107.3                           | 74.8      |
| 5    | 1171.1                                | 13.1      | 771.9                                | 1.7       | 648.7                            | 52.7      |
| 4    | 902.9                                 | 113.6     | 720.4                                | 8.4       | 507.2                            | 23.0      |
| 3    | 609.7                                 | 15.3      | 620.0                                | 10.6      | 336.1                            | 10.7      |
| 2    | 474.6                                 | 54.8      | 599.8                                | 12.5      | 296.1                            | 5.5       |
| 1    | 171.9                                 | 2.5       | 308.9                                | 13.3      | 179.1                            | 0.1       |
|      | d-Si <sub>3</sub> C                   |           | TS-Si <sub>3</sub> C                 |           |                                  |           |
| 6    | 745.1                                 | 4.7       | -543.5                               | n/a       |                                  |           |
| 5    | 658.4                                 | 0.2       | 851.5                                | 13.7      |                                  |           |
| 4    | 454.4                                 | 1.8       | 267.3                                | 33.3      |                                  |           |
| 3    | 397.9                                 | 29.1      | 394.6                                | 5.7       |                                  |           |
| 2    | 262.7                                 | 0.2       | 731.5                                | 5.4       |                                  |           |
| 1    | 91.3                                  | 47.0      | 851.5                                | 1.0       |                                  |           |

Table S8: Harmonic fundamental vibrational frequencies (in  $\text{cm}^{-1}$ ) of GeC isomers at the B3LYP-D3BJ/AVTZ level of theory. Intensities in  $\text{km mol}^{-1}$ .

| Mode | Frequency                             | Intensity | Frequency                            | Intensity | Frequency                        | Intensity |
|------|---------------------------------------|-----------|--------------------------------------|-----------|----------------------------------|-----------|
|      | d-GeC <sub>3</sub>                    |           | r-GeC <sub>3</sub>                   |           | TS-SiC <sub>3</sub>              |           |
| 6    | 1403.6                                | 169.0     | 1612.6                               | 87.4      | -714.3                           | n/a       |
| 5    | 1009.8                                | 1.3       | 1141.7                               | 4.4       | 1449.5                           | 37.1      |
| 4    | 933.6                                 | 28.6      | 704.3                                | 29.2      | 1141.8                           | 51.2      |
| 3    | 510.2                                 | 43.2      | 397.1                                | 22.3      | 590.8                            | 40.5      |
| 2    | 325.3                                 | 33.2      | 311.3                                | 4.5       | 381.9                            | 10.4      |
| 1    | 199.7                                 | 11.8      | 210.9                                | 44.4      | 132.7                            | 8.8       |
|      | r-Ge <sub>2</sub> C <sub>2</sub>      |           | t-Ge <sub>2</sub> C <sub>2</sub>     |           | d-Ge <sub>2</sub> C <sub>2</sub> |           |
| 6    | 1165.4                                | 0.0       | 1622.4                               | 25.7      | 643.6                            | 6.4       |
| 5    | 856.0                                 | 0.0       | 561.2                                | 32.7      | 550.8                            | 6.0       |
| 4    | 796.0                                 | 212.6     | 505.7                                | 48.4      | 457.1                            | 0.0       |
| 3    | 279.3                                 | 0.0       | 374.8                                | 13.1      | 396.5                            | 3.2       |
| 2    | 258.7                                 | 58.3      | 184.1                                | 7.7       | 313.3                            | 0.2       |
| 1    | 145.3                                 | 8.0       | 170.9                                | 1.0       | 123.6                            | 56.1      |
|      | TS-r-t-Ge <sub>2</sub> C <sub>2</sub> |           | TS-d-rGe <sub>2</sub> C <sub>2</sub> |           | r-Ge <sub>3</sub> C              |           |
| 6    | -467.8                                | n/a       | -496.8                               | n/a       | 959.2                            | 94.5      |
| 5    | 1258.0                                | 35.4      | 586.4                                | 17.7      | 506.5                            | 71.5      |
| 4    | 720.4                                 | 86.4      | 551.0                                | 13.3      | 295.8                            | 6.0       |
| 3    | 456.2                                 | 25.9      | 488.4                                | 3.4       | 185.9                            | 3.3       |
| 2    | 363.3                                 | 43.6      | 467.2                                | 14.4      | 169.2                            | 1.1       |
| 1    | 112.7                                 | 0.6       | 250.7                                | 7.0       | 148.3                            | 0.8       |
|      | d-Ge <sub>3</sub> C                   |           | TS-Ge <sub>3</sub> C                 |           |                                  |           |
| 6    | 637.3                                 | 0.5       | -420.4                               | n/a       |                                  |           |
| 5    | 499.3                                 | 4.4       | 674.2                                | 28.3      |                                  |           |
| 4    | 270.1                                 | 1.3       | 533.7                                | 39.6      |                                  |           |
| 3    | 224.4                                 | 10.8      | 213.3                                | 2.5       |                                  |           |
| 2    | 142.8                                 | 0.4       | 191.1                                | 2.0       |                                  |           |
| 1    | 65.9                                  | 36.2      | 123.9                                | 0.2       |                                  |           |



Table S9: Harmonic fundamental vibrational frequencies (in  $\text{cm}^{-1}$ ) of GeSi isomers at the B3LYP-D3BJ/AVTZ level of theory. Intensities in  $\text{km mol}^{-1}$ .

| Mode | Frequency                              | Intensity | Frequency                             | Intensity | Frequency                         | Intensity |
|------|----------------------------------------|-----------|---------------------------------------|-----------|-----------------------------------|-----------|
|      | d-GeSi <sub>3</sub>                    |           | r-GeSi <sub>3</sub>                   |           | TS-SiC <sub>3</sub>               |           |
| 6    | 475.9                                  | 47.2      | 483.3                                 | 54.6      | -410.7                            | n/a       |
| 5    | 410.4                                  | 15.0      | 416.1                                 | 0.5       | 449.1                             | 0.1       |
| 4    | 400.2                                  | 0.0       | 315.0                                 | 6.7       | 396.4                             | 1.2       |
| 3    | 268.7                                  | 3.6       | 300.7                                 | 0.7       | 297.0                             | 2.3       |
| 2    | 202.9                                  | 1.3       | 194.7                                 | 0.1       | 269.0                             | 1.5       |
| 1    | 74.9                                   | 1.2       | 80.0                                  | 2.8       | 152.1                             | 0.0       |
|      | r-Ge <sub>2</sub> Si <sub>2</sub>      |           | t-Ge <sub>2</sub> Si <sub>2</sub>     |           | d-Ge <sub>2</sub> Si <sub>2</sub> |           |
| 6    | 407.6                                  | 0.0       | 463.8                                 | 42.6      | 381.8                             | 43.1      |
| 5    | 392.7                                  | 59.8      | 358.4                                 | 3.5       | 375.7                             | 0.0       |
| 4    | 368.4                                  | 0.0       | 298.7                                 | 3.5       | 294.6                             | 0.0       |
| 3    | 214.5                                  | 0.0       | 238.6                                 | 4.5       | 231.8                             | 0.0       |
| 2    | 178.4                                  | 1.2       | 162.2                                 | 0.1       | 177.3                             | 0.0       |
| 1    | 66.7                                   | 0.8       | 72.2                                  | 1.7       | 75.5                              | 2.3       |
|      | TS-r-t-Ge <sub>2</sub> Si <sub>2</sub> |           | TS-d-rGe <sub>2</sub> Si <sub>2</sub> |           | r-Ge <sub>3</sub> Si              |           |
| 6    | -129.5                                 | n/a       | -365.8                                | n/a       | 398.5                             | 39.2      |
| 5    | 456.1                                  | 31.0      | 357.8                                 | 5.6       | 340.6                             | 1.0       |
| 4    | 404.6                                  | 5.2       | 323.1                                 | 0.1       | 242.0                             | 7.4       |
| 3    | 272.2                                  | 0.3       | 282.3                                 | 0.2       | 204.6                             | 0.1       |
| 2    | 261.6                                  | 2.4       | 265.4                                 | 3.2       | 141.0                             | 0.1       |
| 1    | 91.7                                   | 0.6       | 134.6                                 | 0.0       | 63.0                              | 0.7       |
|      | d-Ge <sub>3</sub> Si                   |           | TS-Ge <sub>3</sub> Si                 |           |                                   |           |
| 6    | 379.9                                  | 24.3      | -335.0                                | n/a       |                                   |           |
| 5    | 272.2                                  | 0.1       | 343.5                                 | 4.9       |                                   |           |
| 4    | 267.0                                  | 8.9       | 299.9                                 | 2.0       |                                   |           |
| 3    | 211.0                                  | 1.5       | 221.0                                 | 1.7       |                                   |           |
| 2    | 144.1                                  | 0.0       | 191.1                                 | 0.7       |                                   |           |
| 1    | 65.8                                   | 1.4       | 114.5                                 | 0.0       |                                   |           |

Table S10: Harmonic fundamental vibrational frequencies (in  $\text{cm}^{-1}$ ) of SiC isomers at the M06-2X/AVTZ level of theory. Intensities in  $\text{km mol}^{-1}$ .

| Mode | Frequency                             | Intensity | Frequency                            | Intensity | Frequency                        | Intensity |
|------|---------------------------------------|-----------|--------------------------------------|-----------|----------------------------------|-----------|
|      | d-SiC <sub>3</sub>                    |           | r-SiC <sub>3</sub>                   |           | TS-SiC <sub>3</sub>              |           |
| 6    | 1455.4                                | 221.9     | 1582.6                               | 81.2      | -834.0                           | n/a       |
| 5    | 1110.4                                | 1.6       | 1180.0                               | 0.5       | 1534.1                           | 31.8      |
| 4    | 1099.2                                | 69.8      | 826.0                                | 48.4      | 1061.4                           | 39.6      |
| 3    | 709.3                                 | 61.8      | 534.3                                | 26.6      | 752.0                            | 77.6      |
| 2    | 425.6                                 | 43.5      | 424.2                                | 1.8       | 437.8                            | 2.7       |
| 1    | 257.9                                 | 7.1       | 224.1                                | 47.5      | 468.3                            | 11.4      |
|      | r-Si <sub>2</sub> C <sub>2</sub>      |           | t-Si <sub>2</sub> C <sub>2</sub>     |           | d-Si <sub>2</sub> C <sub>2</sub> |           |
| 6    | 1182.9                                | 0.0       | 1623.3                               | 14.9      | -139.9                           | n/a       |
| 5    | 1011.1                                | 356.6     | 729.8                                | 28.2      | 784.9                            | 0.0       |
| 4    | 1008.9                                | 0.0       | 657.5                                | 67.0      | 675.7                            | 33.9      |
| 3    | 534.2                                 | 0.0       | 514.7                                | 8.5       | 636.0                            | 0.0       |
| 2    | 380.9                                 | 59.9      | 313.1                                | 0.7       | 561.6                            | 0.0       |
| 1    | 198.8                                 | 4.6       | 215.7                                | 9.9       | 512.1                            | 1.1       |
|      | TS-r-t-Si <sub>2</sub> C <sub>2</sub> |           | TS-d-rSi <sub>2</sub> C <sub>2</sub> |           | r-Si <sub>3</sub> C              |           |
| 6    | -507.2                                | n/a       | -664.2                               | n/a       | 1128.6                           | 85.8      |
| 5    | 1209.7                                | 18.2      | 800.9                                | 1.8       | 679.0                            | 57.5      |
| 4    | 943.2                                 | 115.0     | 726.4                                | 6.1       | 526.3                            | 23.1      |
| 3    | 650.9                                 | 17.3      | 642.7                                | 9.6       | 362.2                            | 15.3      |
| 2    | 531.9                                 | 58.7      | 610.2                                | 15.9      | 311.9                            | 5.5       |
| 1    | 167.6                                 | 5.6       | 300.6                                | 15.8      | 178.5                            | 0.3       |
|      | d-Si <sub>3</sub> C                   |           | TS-Si <sub>3</sub> C                 |           |                                  |           |
| 6    | 773.5                                 | 5.2       | -561.4                               | n/a       |                                  |           |
| 5    | 674.9                                 | 0.5       | 874.0                                | 17.3      |                                  |           |
| 4    | 477.9                                 | 0.7       | 755.0                                | 35.7      |                                  |           |
| 3    | 419.4                                 | 38.3      | 417.3                                | 10.1      |                                  |           |
| 2    | 275.8                                 | 0.7       | 279.6                                | 6.5       |                                  |           |
| 1    | 81.6                                  | 48.2      | 235.5                                | 1.6       |                                  |           |

Table S11: Harmonic fundamental vibrational frequencies (in  $\text{cm}^{-1}$ ) of GeC isomers at the M06-2X/AVTZ level of theory. Intensities in  $\text{km mol}^{-1}$ .

| Mode | Frequency                             | Intensity | Frequency                            | Intensity | Frequency                        | Intensity |
|------|---------------------------------------|-----------|--------------------------------------|-----------|----------------------------------|-----------|
|      | d-GeC <sub>3</sub>                    |           | r-GeC <sub>3</sub>                   |           | TS-SiC <sub>3</sub>              |           |
| 6    | 1457.9                                | 188.3     | 1597.3                               | 111.6     | -785.9                           | n/a       |
| 5    | 1082.7                                | 0.8       | 1168.0                               | 3.5       | 1537.9                           | 29.6      |
| 4    | 1028.0                                | 48.3      | 754.7                                | 28.5      | 1080.9                           | 51.8      |
| 3    | 541.6                                 | 49.3      | 432.4                                | 25.7      | 599.4                            | 53.4      |
| 2    | 360.7                                 | 36.9      | 350.3                                | 3.7       | 408.5                            | 4.5       |
| 1    | 242.4                                 | 7.7       | 227.3                                | 41.4      | 283.8                            | 11.0      |
|      | r-Ge <sub>2</sub> C <sub>2</sub>      |           | t-Ge <sub>2</sub> C <sub>2</sub>     |           | d-Ge <sub>2</sub> C <sub>2</sub> |           |
| 6    | 1202.2                                | 0.0       | 1676.0                               | 24.2      | 674.5                            | 7.7       |
| 5    | 911.8                                 | 0.0       | 593.4                                | 34.1      | 571.6                            | 14.3      |
| 4    | 841.2                                 | 223.9     | 534.2                                | 41.0      | 481.8                            | 0.0       |
| 3    | 297.7                                 | 0.0       | 400.4                                | 16.8      | 411.3                            | 0.0       |
| 2    | 280.9                                 | 60.1      | 202.0                                | 8.0       | 323.5                            | 0.2       |
| 1    | 153.2                                 | 8.0       | 193.3                                | 1.0       | 120.6                            | 62.7      |
|      | TS-r-t-Ge <sub>2</sub> C <sub>2</sub> |           | TS-d-rGe <sub>2</sub> C <sub>2</sub> |           | r-Ge <sub>3</sub> C              |           |
| 6    | -471.6                                | n/a       | -492.2                               | n/a       | 996.5                            | 85.8      |
| 5    | 1290.5                                | 65.9      | 634.7                                | 13.7      | 542.1                            | 72.7      |
| 4    | 763.7                                 | 51.4      | 554.7                                | 7.7       | 311.0                            | 6.2       |
| 3    | 502.5                                 | 19.6      | 512.6                                | 6.0       | 202.8                            | 5.9       |
| 2    | 404.5                                 | 62.2      | 493.5                                | 18.3      | 184.9                            | 1.2       |
| 1    | 111.0                                 | 4.2       | 245.6                                | 9.2       | 152.9                            | 0.9       |
|      | d-Ge <sub>3</sub> C                   |           | TS-Ge <sub>3</sub> C                 |           |                                  |           |
| 6    | 672.3                                 | 0.1       | -378.2                               | n/a       |                                  |           |
| 5    | 516.1                                 | 1.4       | 719.3                                | 34.4      |                                  |           |
| 4    | 284.0                                 | 1.2       | 559.3                                | 42.2      |                                  |           |
| 3    | 236.7                                 | 14.9      | 228.7                                | 4.7       |                                  |           |
| 2    | 150.0                                 | 0.1       | 192.4                                | 2.7       |                                  |           |
| 1    | 96.5                                  | 39.4      | 136.3                                | 0.5       |                                  |           |

Table S12: Harmonic fundamental vibrational frequencies (in  $\text{cm}^{-1}$ ) of GeSi isomers at the M06-2X/AVTZ level of theory. Intensities in  $\text{km mol}^{-1}$ .

| Mode | Frequency                              | Intensity | Frequency                             | Intensity | Frequency                         | Intensity |
|------|----------------------------------------|-----------|---------------------------------------|-----------|-----------------------------------|-----------|
|      | d-GeSi <sub>3</sub>                    |           | r-GeSi <sub>3</sub>                   |           | TS-SiC <sub>3</sub>               |           |
| 6    | 511.8                                  | 58.1      | 508.6                                 | 75.5      | -450.9                            | n/a       |
| 5    | 439.6                                  | 20.6      | 441.0                                 | 0.7       | 473.5                             | 0.0       |
| 4    | 435.2                                  | 0.0       | 341.8                                 | 9.5       | 414.4                             | 1.7       |
| 3    | 286.2                                  | 4.5       | 324.2                                 | 1.1       | 309.7                             | 3.3       |
| 2    | 214.6                                  | 2.2       | 207.3                                 | 0.4       | 273.5                             | 1.4       |
| 1    | 80.3                                   | 1.6       | 77.0                                  | 2.6       | 150.6                             | 0.2       |
|      | r-Ge <sub>2</sub> Si <sub>2</sub>      |           | t-Ge <sub>2</sub> Si <sub>2</sub>     |           | d-Ge <sub>2</sub> Si <sub>2</sub> |           |
| 6    | 436.1                                  | 0.0       | 495.6                                 | 56.0      | 407.1                             | 64.0      |
| 5    | 423.4                                  | 77.3      | 382.6                                 | 5.4       | 400.9                             | 0.0       |
| 4    | 401.6                                  | 0.0       | 323.8                                 | 5.5       | 316.1                             | 0.0       |
| 3    | 229.7                                  | 0.0       | 254.5                                 | 6.0       | 250.4                             | 0.0       |
| 2    | 187.6                                  | 2.0       | 173.0                                 | 0.4       | 187.0                             | 0.2       |
| 1    | 70.6                                   | 0.7       | 74.2                                  | 1.6       | 75.7                              | 2.2       |
|      | TS-r-t-Ge <sub>2</sub> Si <sub>2</sub> |           | TS-d-rGe <sub>2</sub> Si <sub>2</sub> |           | r-Ge <sub>3</sub> Si              |           |
| 6    | -150.5                                 | n/a       | -381.0                                | n/a       | 425.6                             | 53.6      |
| 5    | 473.5                                  | 36.6      | 379.2                                 | 6.2       | 364.0                             | 1.5       |
| 4    | 433.4                                  | 8.6       | 337.2                                 | 0.1       | 262.6                             | 10.8      |
| 3    | 289.8                                  | 1.0       | 294.2                                 | 1.0       | 219.7                             | 0.2       |
| 2    | 276.4                                  | 3.3       | 273.1                                 | 2.0       | 150.8                             | 0.3       |
| 1    | 106.2                                  | 1.6       | 132.7                                 | 0.0       | 66.7                              | 0.7       |
|      | d-Ge <sub>3</sub> Si                   |           | TS-Ge <sub>3</sub> Si                 |           |                                   |           |
| 6    | 408.4                                  | 34.8      | -336.1                                | n/a       |                                   |           |
| 5    | 292.2                                  | 0.0       | 365.5                                 | 5.4       |                                   |           |
| 4    | 284.7                                  | 13.3      | 308.7                                 | 3.2       |                                   |           |
| 3    | 226.1                                  | 2.2       | 231.1                                 | 1.9       |                                   |           |
| 2    | 151.4                                  | 0.1       | 202.2                                 | 0.4       |                                   |           |
| 1    | 68.5                                   | 1.4       | 112.4                                 | 0.1       |                                   |           |

Table S13: Harmonic fundamental vibrational frequencies (in  $\text{cm}^{-1}$ ) of SiC isomers at the  $\omega\text{B97X-D4/AVTZ}$  level of theory. Intensities in  $\text{km mol}^{-1}$ .

| Mode | Frequency                             | Intensity | Frequency                            | Intensity | Frequency                        | Intensity |
|------|---------------------------------------|-----------|--------------------------------------|-----------|----------------------------------|-----------|
|      | d-SiC <sub>3</sub>                    |           | r-SiC <sub>3</sub>                   |           | TS-SiC <sub>3</sub>              |           |
| 6    | 1461.8                                | 231.1     | 1594.9                               | 69.4      | -908.0                           | n/a       |
| 5    | 1099.0                                | 1.4       | 1193.3                               | 0.4       | 1561.1                           | 33.1      |
| 4    | 1087.3                                | 74.6      | 831.1                                | 47.9      | 1026.3                           | 42.5      |
| 3    | 719.5                                 | 62.2      | 553.7                                | 27.9      | 749.2                            | 89.5      |
| 2    | 432.1                                 | 46.0      | 436.9                                | 1.9       | 444.3                            | 0.9       |
| 1    | 272.0                                 | 7.4       | 245.6                                | 46.1      | 380.7                            | 12.8      |
|      | r-Si <sub>2</sub> C <sub>2</sub>      |           | t-Si <sub>2</sub> C <sub>2</sub>     |           | d-Si <sub>2</sub> C <sub>2</sub> |           |
| 6    | 1170.7                                | 0.0       | 1627.1                               | 17.1      | -45.6                            | n/a       |
| 5    | 1036.0                                | 378.3     | 746.2                                | 26.8      | 811.7                            | 0.0       |
| 4    | 1024.8                                | 0.0       | 662.6                                | 64.6      | 693.2                            | 39.7      |
| 3    | 548.6                                 | 0.0       | 524.4                                | 9.1       | 641.4                            | 0.0       |
| 2    | 393.0                                 | 59.9      | 343.8                                | 0.4       | 570.5                            | 0.0       |
| 1    | 203.0                                 | 3.3       | 218.3                                | 10.7      | 512.0                            | 9.6       |
|      | TS-r-t-Si <sub>2</sub> C <sub>2</sub> |           | TS-d-rSi <sub>2</sub> C <sub>2</sub> |           | r-Si <sub>3</sub> C              |           |
| 6    | -487.4                                | n/a       | -747.1                               | n/a       | 1150.3                           | 86.0      |
| 5    | 1201.2                                | 25.3      | 826.3                                | 2.1       | 702.7                            | 51.5      |
| 4    | 981.6                                 | 118.0     | 716.2                                | 5.3       | 539.7                            | 26.1      |
| 3    | 673.1                                 | 16.6      | 644.8                                | 8.2       | 391.6                            | 20.9      |
| 2    | 565.3                                 | 58.6      | 613.2                                | 34.1      | 334.6                            | 6.6       |
| 1    | 198.8                                 | 8.6       | 299.8                                | 14.4      | 177.2                            | 0.1       |
|      | d-Si <sub>3</sub> C                   |           | TS-Si <sub>3</sub> C                 |           |                                  |           |
| 6    | 798.7                                 | 5.9       | -600.9                               | n/a       |                                  |           |
| 5    | 673.0                                 | 4.0       | 907.0                                | 34.8      |                                  |           |
| 4    | 502.3                                 | 0.5       | 745.5                                | 36.3      |                                  |           |
| 3    | 441.5                                 | 49.3      | 436.3                                | 17.0      |                                  |           |
| 2    | 288.2                                 | 3.3       | 293.8                                | 6.8       |                                  |           |
| 1    | 91.6                                  | 58.9      | 233.2                                | 2.6       |                                  |           |

Table S14: Harmonic fundamental vibrational frequencies (in  $\text{cm}^{-1}$ ) of GeC isomers at the  $\omega\text{B97X-D4/AVTZ}$  level of theory. Intensities in  $\text{km mol}^{-1}$ .

| Mode | Frequency                             | Intensity | Frequency                            | Intensity | Frequency                        | Intensity |
|------|---------------------------------------|-----------|--------------------------------------|-----------|----------------------------------|-----------|
|      | d-GeC <sub>3</sub>                    |           | r-GeC <sub>3</sub>                   |           | TS-SiC <sub>3</sub>              |           |
| 6    | 1462.5                                | 202.7     | 1609.4                               | 93.5      | -853.8                           | n/a       |
| 5    | 1070.1                                | 1.1       | 1180.1                               | 3.4       | 1544.9                           | 32.2      |
| 4    | 1025.6                                | 48.6      | 755.8                                | 28.5      | 1050.7                           | 49.0      |
| 3    | 552.3                                 | 57.2      | 441.3                                | 32.2      | 603.3                            | 63.2      |
| 2    | 368.4                                 | 38.8      | 357.6                                | 3.4       | 410.8                            | 3.7       |
| 1    | 249.4                                 | 7.1       | 247.0                                | 40.4      | 303.1                            | 10.5      |
|      | r-Ge <sub>2</sub> C <sub>2</sub>      |           | t-Ge <sub>2</sub> C <sub>2</sub>     |           | d-Ge <sub>2</sub> C <sub>2</sub> |           |
| 6    | 1179.8                                | 0.0       | 1671.7                               | 26.8      | 741.0                            | 0.0       |
| 5    | 932.6                                 | 0.0       | 604.3                                | 36.1      | 582.5                            | 35.1      |
| 4    | 873.0                                 | 295.0     | 536.7                                | 44.4      | 495.0                            | 0.0       |
| 3    | 312.5                                 | 0.0       | 399.6                                | 19.4      | 399.1                            | 0.0       |
| 2    | 297.5                                 | 61.7      | 208.0                                | 0.6       | 341.6                            | 0.0       |
| 1    | 155.4                                 | 7.5       | 197.7                                | 7.8       | 116.7                            | 85.9      |
|      | TS-r-t-Ge <sub>2</sub> C <sub>2</sub> |           | TS-d-rGe <sub>2</sub> C <sub>2</sub> |           | r-Ge <sub>3</sub> C              |           |
| 6    | -472.7                                | n/a       | -601.4                               | n/a       | 1015.4                           | 112.5     |
| 5    | 1254.7                                | 37.7      | 648.0                                | 19.7      | 564.4                            | 80.9      |
| 4    | 800.6                                 | 78.5      | 559.6                                | 8.3       | 320.3                            | 8.3       |
| 3    | 539.7                                 | 23.7      | 514.7                                | 2.4       | 221.0                            | 6.9       |
| 2    | 432.1                                 | 58.9      | 494.8                                | 16.1      | 195.4                            | 1.1       |
| 1    | 138.4                                 | 4.3       | 236.5                                | 8.0       | 149.0                            | 0.8       |
|      | d-Ge <sub>3</sub> C                   |           | TS-Ge <sub>3</sub> C                 |           |                                  |           |
| 6    | 700.2                                 | 0.4       | -469.4                               | n/a       |                                  |           |
| 5    | 528.5                                 | 0.9       | 727.5                                | 51.6      |                                  |           |
| 4    | 296.6                                 | 0.3       | 558.1                                | 47.7      |                                  |           |
| 3    | 253.9                                 | 19.9      | 236.7                                | 5.8       |                                  |           |
| 2    | 162.7                                 | 0.0       | 185.6                                | 2.2       |                                  |           |
| 1    | 107.8                                 | 37.6      | 138.3                                | 0.4       |                                  |           |

Table S15: Harmonic fundamental vibrational frequencies (in  $\text{cm}^{-1}$ ) of GeSi isomers at the  $\omega\text{B97X-D4/AVTZ}$  level of theory. Intensities in  $\text{km mol}^{-1}$ .

| Mode | Frequency                              | Intensity | Frequency                             | Intensity | Frequency                         | Intensity |
|------|----------------------------------------|-----------|---------------------------------------|-----------|-----------------------------------|-----------|
|      | d-GeSi <sub>3</sub>                    |           | r-GeSi <sub>3</sub>                   |           | TS-SiC <sub>3</sub>               |           |
| 6    | 533.0                                  | 71.6      | 535.7                                 | 88.9      | -501.7                            | n/a       |
| 5    | 464.0                                  | 30.0      | 469.6                                 | 1.2       | 525.3                             | 0.2       |
| 4    | 451.4                                  | 0.1       | 361.3                                 | 11.7      | 433.2                             | 2.8       |
| 3    | 299.3                                  | 6.1       | 334.3                                 | 1.5       | 324.3                             | 3.4       |
| 2    | 224.8                                  | 4.7       | 214.0                                 | 1.3       | 271.9                             | 1.2       |
| 1    | 82.3                                   | 1.9       | 88.3                                  | 2.8       | 149.0                             | 0.9       |
|      | r-Ge <sub>2</sub> Si <sub>2</sub>      |           | t-Ge <sub>2</sub> Si <sub>2</sub>     |           | d-Ge <sub>2</sub> Si <sub>2</sub> |           |
| 6    | 465.8                                  | 0.0       | 517.0                                 | 68.6      | 431.1                             | 73.7      |
| 5    | 440.8                                  | 99.9      | 406.6                                 | 6.7       | 428.5                             | 0.0       |
| 4    | 418.3                                  | 0.0       | 340.3                                 | 7.3       | 336.8                             | 0.0       |
| 3    | 240.1                                  | 0.0       | 267.6                                 | 7.6       | 256.7                             | 0.0       |
| 2    | 200.4                                  | 4.0       | 181.4                                 | 1.0       | 196.4                             | 0.5       |
| 1    | 72.1                                   | 0.8       | 78.9                                  | 1.7       | 83.8                              | 2.4       |
|      | TS-r-t-Ge <sub>2</sub> Si <sub>2</sub> |           | TS-d-rGe <sub>2</sub> Si <sub>2</sub> |           | r-Ge <sub>3</sub> Si              |           |
| 6    | -161.1                                 | n/a       | -446.3                                | n/a       | 445.7                             | 65.0      |
| 5    | 496.0                                  | 34.9      | 420.9                                 | 7.5       | 388.5                             | 2.2       |
| 4    | 464.8                                  | 16.3      | 350.4                                 | 0.1       | 279.5                             | 13.7      |
| 3    | 313.7                                  | 1.6       | 308.2                                 | 0.1       | 230.1                             | 0.2       |
| 2    | 289.1                                  | 3.9       | 261.3                                 | 1.3       | 159.3                             | 0.8       |
| 1    | 148.3                                  | 2.3       | 150.8                                 | 0.5       | 68.1                              | 0.7       |
|      | d-Ge <sub>3</sub> Si                   |           | TS-Ge <sub>3</sub> Si                 |           |                                   |           |
| 6    | 432.2                                  | 40.1      | -400.1                                | n/a       |                                   |           |
| 5    | 311.1                                  | 0.0       | 405.1                                 | 6.7       |                                   |           |
| 4    | 304.5                                  | 17.3      | 320.8                                 | 3.0       |                                   |           |
| 3    | 235.2                                  | 2.5       | 248.7                                 | 3.1       |                                   |           |
| 2    | 162.4                                  | 0.3       | 199.5                                 | 0.4       |                                   |           |
| 1    | 72.6                                   | 1.5       | 121.8                                 | 0.1       |                                   |           |

Table S16: Harmonic fundamental vibrational frequencies (in  $\text{cm}^{-1}$ ) of SiC isomers at the B2GP-PLYP/AVTZ level of theory. Intensities in  $\text{km mol}^{-1}$ .

| Mode | Frequency                             | Intensity | Frequency                            | Intensity | Frequency                        | Intensity |
|------|---------------------------------------|-----------|--------------------------------------|-----------|----------------------------------|-----------|
|      | d-SiC <sub>3</sub>                    |           | r-SiC <sub>3</sub>                   |           | TS-SiC <sub>3</sub>              |           |
| 6    | 1409.2                                | 205.8     | 1614.9                               | 59.8      | -888.4                           | n/a       |
| 5    | 1052.2                                | 1.9       | 1146.9                               | 0.2       | 1462.8                           | 49.4      |
| 4    | 989.2                                 | 44.1      | 800.3                                | 51.6      | 1078.8                           | 39.8      |
| 3    | 683.4                                 | 49.8      | 516.8                                | 19.2      | 734.6                            | 71.0      |
| 2    | 428.4                                 | 40.0      | 411.5                                | 3.9       | 422.2                            | 6.1       |
| 1    | 261.1                                 | 8.5       | 233.9                                | 53.8      | 309.0                            | 12.6      |
|      | r-Si <sub>2</sub> C <sub>2</sub>      |           | t-Si <sub>2</sub> C <sub>2</sub>     |           | d-Si <sub>2</sub> C <sub>2</sub> |           |
| 6    | 1091.3                                | 0.0       | 1572.8                               | 18.9      | -165.9                           | n/a       |
| 5    | 993.9                                 | 316.0     | 724.5                                | 27.3      | 747.8                            | 0.0       |
| 4    | 969.2                                 | 0.0       | 639.9                                | 66.8      | 688.5                            | 6.3       |
| 3    | 512.6                                 | 0.0       | 511.9                                | 6.3       | 622.9                            | 0.0       |
| 2    | 373.3                                 | 61.4      | 299.5                                | 1.2       | 553.0                            | 0.0       |
| 1    | 206.1                                 | 3.7       | 208.3                                | 10.6      | 534.3                            | 1.5       |
|      | TS-r-t-Si <sub>2</sub> C <sub>2</sub> |           | TS-d-rSi <sub>2</sub> C <sub>2</sub> |           | r-Si <sub>3</sub> C              |           |
| 6    | -509.0                                | n/a       | -744.7                               | n/a       | 1118.5                           | 79.4      |
| 5    | 1163.0                                | 12.3      | 1503.3                               | 1225.5    | 654.4                            | 48.9      |
| 4    | 913.5                                 | 99.5      | 761.6                                | 29.1      | 507.1                            | 20.6      |
| 3    | 628.2                                 | 14.4      | 742.2                                | 24.8      | 358.8                            | 11.3      |
| 2    | 489.8                                 | 65.9      | 649.3                                | 28.7      | 307.1                            | 5.8       |
| 1    | 163.6                                 | 3.1       | 333.8                                | 6.8       | 175.0                            | 0.1       |
|      | d-Si <sub>3</sub> C                   |           | TS-Si <sub>3</sub> C                 |           |                                  |           |
| 6    | 755.0                                 | 1.3       | -591.5                               | n/a       |                                  |           |
| 5    | 668.1                                 | 0.1       | 847.9                                | 23.7      |                                  |           |
| 4    | 473.5                                 | 1.1       | 754.5                                | 52.0      |                                  |           |
| 3    | 403.4                                 | 24.3      | 413.9                                | 6.0       |                                  |           |
| 2    | 282.3                                 | 0.1       | 286.9                                | 5.9       |                                  |           |
| 1    | 54.3                                  | 59.8      | 238.5                                | 3.0       |                                  |           |



Table S17: Harmonic fundamental vibrational frequencies (in  $\text{cm}^{-1}$ ) of GeC isomers at the B2GP-PLYP/AVTZ level of theory. Intensities in  $\text{km mol}^{-1}$ .

| Mode | Frequency                             | Intensity | Frequency                            | Intensity | Frequency                        | Intensity |
|------|---------------------------------------|-----------|--------------------------------------|-----------|----------------------------------|-----------|
|      | d-GeC <sub>3</sub>                    |           | r-GeC <sub>3</sub>                   |           | TS-SiC <sub>3</sub>              |           |
| 6    | 1404.6                                | 177.2     | 1633.3                               | 81.5      | -791.5                           | n/a       |
| 5    | 1031.2                                | 1.7       | 1135.0                               | 2.9       | 1453.0                           | 41.5      |
| 4    | 919.0                                 | 21.0      | 725.9                                | 31.6      | 1123.9                           | 59.9      |
| 3    | 524.7                                 | 43.4      | 420.0                                | 21.9      | 603.3                            | 48.8      |
| 2    | 366.6                                 | 33.2      | 339.7                                | 4.7       | 387.9                            | 10.4      |
| 1    | 242.1                                 | 9.9       | 236.2                                | 47.0      | 200.6                            | 10.0      |
|      | r-Ge <sub>2</sub> C <sub>2</sub>      |           | t-Ge <sub>2</sub> C <sub>2</sub>     |           | d-Ge <sub>2</sub> C <sub>2</sub> |           |
| 6    | 1118.3                                | 0.0       | 1593.4                               | 25.5      | 630.8                            | 6.2       |
| 5    | 880.6                                 | 0.0       | 587.9                                | 31.4      | 589.3                            | 0.3       |
| 4    | 830.1                                 | 218.2     | 530.7                                | 48.9      | 500.7                            | 0.0       |
| 3    | 288.5                                 | 0.0       | 402.1                                | 16.1      | 447.5                            | 7.0       |
| 2    | 277.1                                 | 58.7      | 200.2                                | 8.8       | 315.2                            | 0.4       |
| 1    | 163.6                                 | 7.3       | 183.7                                | 0.9       | 113.1                            | 50.8      |
|      | TS-r-t-Ge <sub>2</sub> C <sub>2</sub> |           | TS-d-rGe <sub>2</sub> C <sub>2</sub> |           | r-Ge <sub>3</sub> C              |           |
| 6    | -498.1                                | n/a       | -896.5                               | n/a       | 982.6                            | 97.7      |
| 5    | 1232.7                                | 40.5      | 1121.1                               | 58.0      | 529.4                            | 64.8      |
| 4    | 748.0                                 | 80.2      | 607.0                                | 24.4      | 297.6                            | 5.8       |
| 3    | 486.3                                 | 24.0      | 536.7                                | 24.0      | 203.2                            | 3.5       |
| 2    | 384.4                                 | 51.5      | 525.5                                | 61.4      | 180.3                            | 1.1       |
| 1    | 111.9                                 | 0.8       | 283.1                                | 4.6       | 149.2                            | 0.4       |
|      | d-Ge <sub>3</sub> C                   |           | TS-Ge <sub>3</sub> C                 |           |                                  |           |
| 6    | 649.7                                 | 0.4       | -419.3                               | n/a       |                                  |           |
| 5    | 523.2                                 | 5.6       | 682.6                                | 20.3      |                                  |           |
| 4    | 281.8                                 | 0.9       | 578.3                                | 66.0      |                                  |           |
| 3    | 231.2                                 | 8.2       | 235.8                                | 2.7       |                                  |           |
| 2    | 158.5                                 | 0.3       | 200.8                                | 2.3       |                                  |           |
| 1    | 66.7                                  | 40.7      | 149.7                                | 0.2       |                                  |           |

Table S18: Harmonic fundamental vibrational frequencies (in  $\text{cm}^{-1}$ ) of GeSi isomers at the B2GP-PLYP/AVTZ level of theory. Intensities in  $\text{km mol}^{-1}$ .

| Mode | Frequency                              | Intensity | Frequency                             | Intensity | Frequency                         | Intensity |
|------|----------------------------------------|-----------|---------------------------------------|-----------|-----------------------------------|-----------|
|      | d-GeSi <sub>3</sub>                    |           | r-GeSi <sub>3</sub>                   |           | TS-SiC <sub>3</sub>               |           |
| 6    | 486.7                                  | 42.6      | 490.3                                 | 47.4      | -359.9                            | n/a       |
| 5    | 421.1                                  | 1.6       | 421.4                                 | 0.5       | 448.7                             | 0.2       |
| 4    | 412.0                                  | 0.0       | 332.4                                 | 5.6       | 406.2                             | 0.7       |
| 3    | 272.5                                  | 2.7       | 308.2                                 | 0.4       | 327.8                             | 4.5       |
| 2    | 225.0                                  | 1.1       | 212.9                                 | 0.1       | 309.1                             | 0.5       |
| 1    | 88.6                                   | 2.3       | 94.6                                  | 3.4       | 156.3                             | 0.0       |
|      | r-Ge <sub>2</sub> Si <sub>2</sub>      |           | t-Ge <sub>2</sub> Si <sub>2</sub>     |           | d-Ge <sub>2</sub> Si <sub>2</sub> |           |
| 6    | 418.3                                  | 0.0       | 470.1                                 | 36.9      | 396.7                             | 37.2      |
| 5    | 406.2                                  | 53.5      | 367.9                                 | 2.7       | 381.8                             | 0.0       |
| 4    | 381.2                                  | 0.0       | 314.1                                 | 3.4       | 303.2                             | 0.0       |
| 3    | 218.0                                  | 0.0       | 242.7                                 | 3.3       | 237.2                             | 0.0       |
| 2    | 200.9                                  | 1.2       | 177.6                                 | 0.1       | 196.5                             | 0.3       |
| 1    | 83.2                                   | 1.6       | 65.7                                  | 2.4       | 96.2                              | 3.0       |
|      | TS-r-t-Ge <sub>2</sub> Si <sub>2</sub> |           | TS-d-rGe <sub>2</sub> Si <sub>2</sub> |           | r-Ge <sub>3</sub> Si              |           |
| 6    | -140.0                                 | n/a       | -315.3                                | n/a       | 405.6                             | 34.9      |
| 5    | 462.3                                  | 22.2      | 367.1                                 | 2.9       | 352.0                             | 0.7       |
| 4    | 416.7                                  | 4.4       | 345.3                                 | 0.2       | 259.1                             | 7.2       |
| 3    | 291.7                                  | 0.1       | 310.7                                 | 5.6       | 208.9                             | 0.1       |
| 2    | 271.0                                  | 2.3       | 295.9                                 | 1.4       | 156.3                             | 0.1       |
| 1    | 86.6                                   | 0.6       | 149.0                                 | 0.1       | 75.2                              | 1.0       |
|      | d-Ge <sub>3</sub> Si                   |           | TS-Ge <sub>3</sub> Si                 |           |                                   |           |
| 6    | 390.8                                  | 22.1      | -277.1                                | n/a       |                                   |           |
| 5    | 283.4                                  | 0.0       | 350.9                                 | 3.1       |                                   |           |
| 4    | 276.9                                  | 7.0       | 313.3                                 | 2.0       |                                   |           |
| 3    | 217.2                                  | 1.2       | 247.3                                 | 2.3       |                                   |           |
| 2    | 162.2                                  | 0.0       | 219.7                                 | 0.7       |                                   |           |
| 1    | 86.1                                   | 1.4       | 127.2                                 | 0.0       |                                   |           |
